# Supplementary material for: Angiotensin-II-Evoked Ca2+ Entry in Murine Cardiac Fibroblasts Does Not Depend on TRPC Channels
Source: MDPI journal article supplement (doi:10.3390/cells9020322), 2020-01-29
Supplement: s1 [file s1]

## SUPPLEMENTARY MATERIAL

# Angiotensin-II-evoked Ca<sup>2+</sup> entry in murine cardiac fibroblasts does not depend on TRPC channels

Juan E. Camacho Londoño<sup>1,2,†\*</sup>, André Marx<sup>1,†</sup>, Axel E. Kraft<sup>1,2</sup>, Alexander Schürger<sup>1,2</sup>, Christin Richter<sup>1</sup>, Alexander Dietrich<sup>2</sup>, Peter Lipp<sup>4</sup>, Lutz Birnbaumer<sup>5</sup> and Marc Freichel<sup>1,2,\*</sup>

<sup>1</sup>Pharmakologisches Institut, Ruprecht-Karls-Universität Heidelberg, INF 366, 69120 Heidelberg, Germany.

<sup>2</sup>DZHK (German Centre for Cardiovascular Research), partner site Heidelberg/Mannheim, Germany.

<sup>3</sup>Walther-Straub-Institut für Pharmakologie und Toxikologie, Ludwig-Maximilians-Universität, 80336 München, Germany.

<sup>4</sup>Medical Faculty, Centre for Molecular Signalling (PZMS), Institute for Molecular Cell Biology and Research Center for Molecular Imaging and Screening, Saarland University, Homburg/Saar, Germany.

<sup>5</sup>Laboratory of Neurobiology, NIEHS, North Carolina, USA and Institute of Biomedical Research (BIOMED), Catholic University of Argentina, Buenos Aires, Argentina.

\*Correspondence: [juan.londono@pharma.uni-heidelberg.de](mailto:juan.londono@pharma.uni-heidelberg.de) and [marc.freichel@pharma.uni-heidelberg.de](mailto:marc.freichel@pharma.uni-heidelberg.de)

<sup>†</sup>These authors contributed equally to this work.

**Graphical Abstract: Angiotensin-II-evoked Ca<sup>2+</sup> entry in murine cardiac fibroblasts (CFs) does not depend on TRPC channels.**

**Figure S1. AngII- and Thrombin- induced Ca<sup>2+</sup> transients in TRPC1/C4-DKO cardiac fibroblasts.**

**Figure S2. AngII-induced Ca<sup>2+</sup> release and Ca<sup>2+</sup> entry in the absence of TRPC3/C6 or after TGF-β pre-treatment.**

**Figure S3. AngII-induced Ca<sup>2+</sup> release and Ca<sup>2+</sup> entry in cardiac fibroblasts after acute blockage with the TRPC blocker T320722.**

**Figure S4. AngII-induced Ca<sup>2+</sup> release and Ca<sup>2+</sup> entry in cardiac fibroblasts in the absence of all seven TRPC proteins.**

**Table S1. Primers used for qPCR analysis of *Trpc* transcripts.**

**Table S2. Immunocytochemistry conditions used for characterization and analysis of cardiac fibroblasts.**

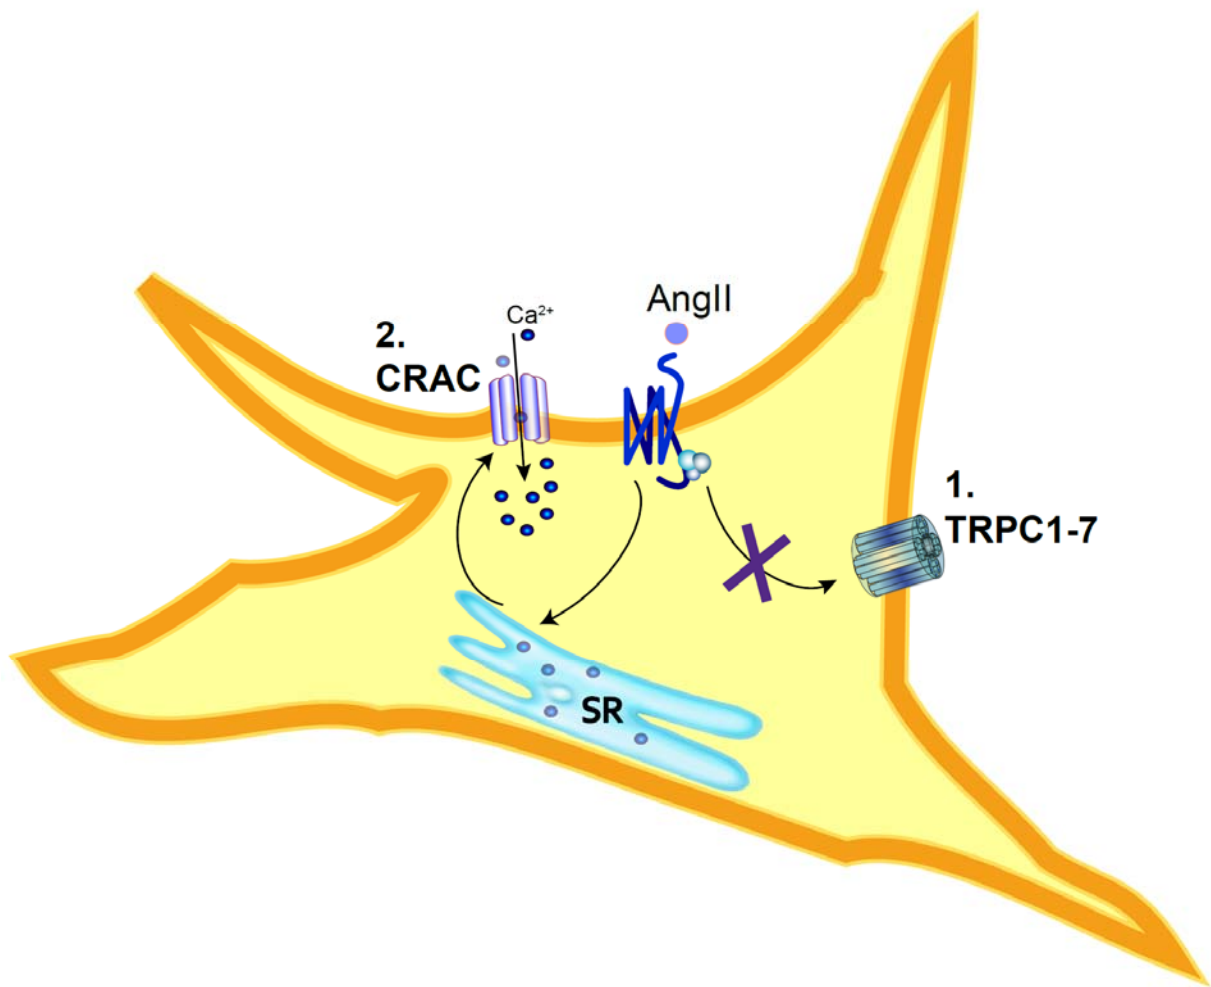

**Graphical Abstract: Angiotensin-II-evoked  $\text{Ca}^{2+}$  entry in murine cardiac fibroblasts (CFs) does not depend on TRPC channels.** Using genetic and pharmacological tools we evaluated the Angiotensin II (AngII)-induced  $\text{Ca}^{2+}$  release and  $\text{Ca}^{2+}$  entry. We concluded: 1. that complete deletion of all 7 TRPC proteins does not alter this acute response to AngII, and 2. that GSK7975A, a CRAC blocker, was able to abolish the AngII-induced  $\text{Ca}^{2+}$  entry in CFs.

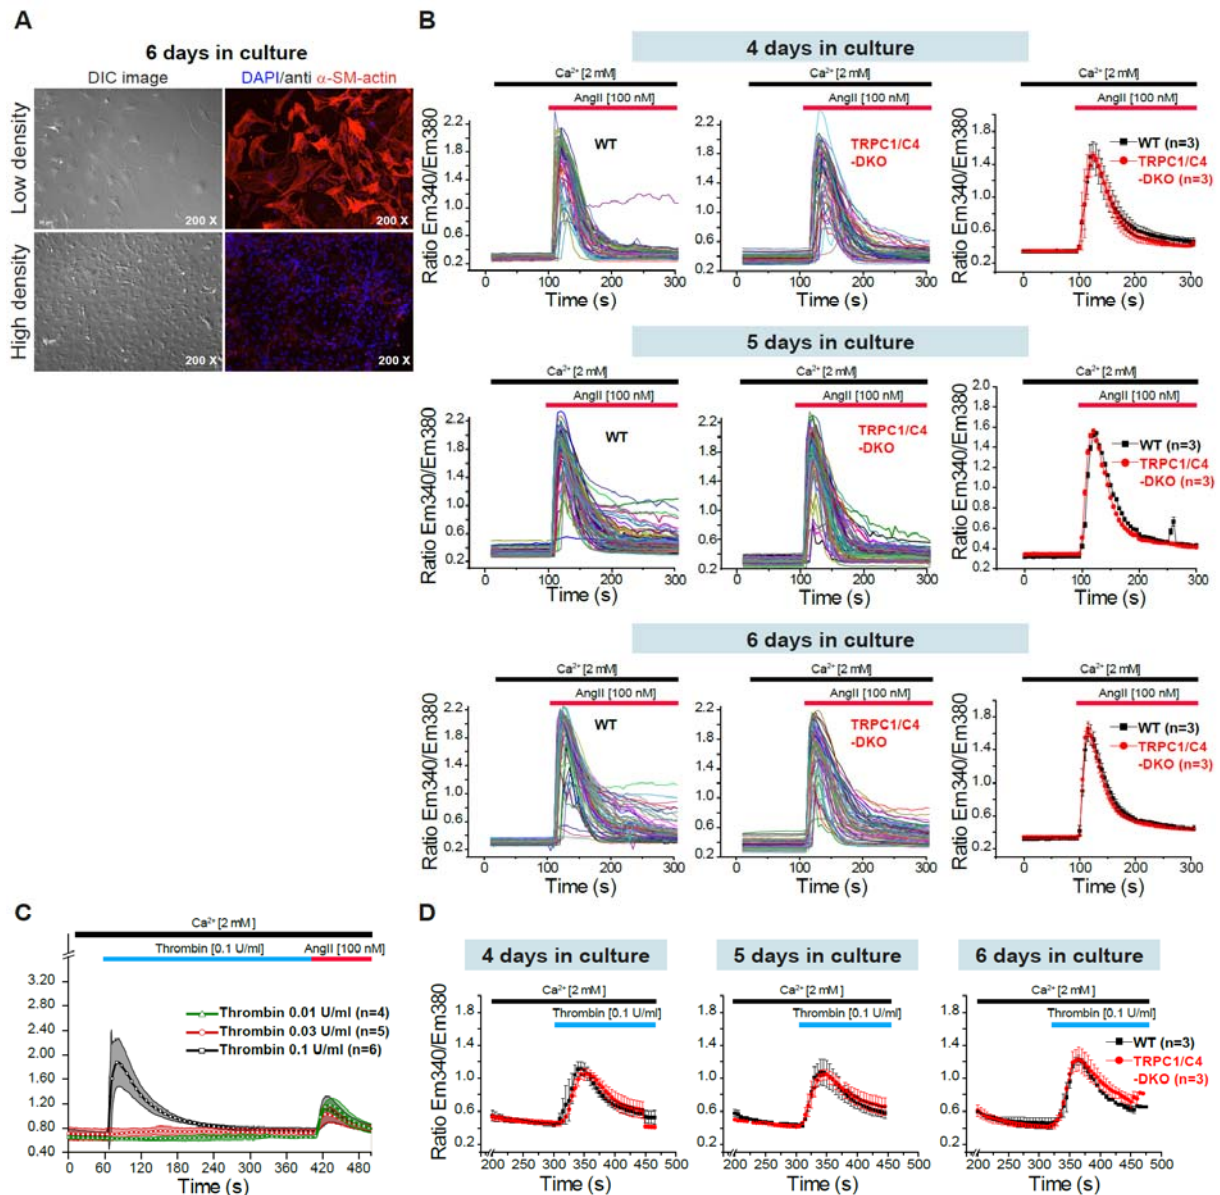

**Figure S1. AngII- and Thrombin- induced Ca<sup>2+</sup> transients in TRPC1/C4-DKO cardiac fibroblasts.**

(A) Analysis of  $\alpha$ -smooth muscle actin after 6 days in culture from WT cardiac fibroblasts cultivated at low and high density conditions. (B) AngII-induced Ca<sup>2+</sup> transients in primary cardiac fibroblasts from WT (black) and TRPC1/C4-DKO (red) mice. Ca<sup>2+</sup> transients were measured in the presence of 2 mM extracellular Ca<sup>2+</sup>. Left panels: Original traces and right panels: Mean values of three independent preparations (hearts). (C) Ca<sup>2+</sup> transients in WT fibroblasts induced by different concentrations of Thrombin. (D) Thrombin-induced Ca<sup>2+</sup> transients in primary cardiac fibroblasts from WT (black) and TRPC1/C4-DKO (red) mice. Ca<sup>2+</sup> transients were measured in the in the presence of 2 mM extracellular Ca<sup>2+</sup>. n= number of independent preparations (hearts). All cells were cultured at high density.

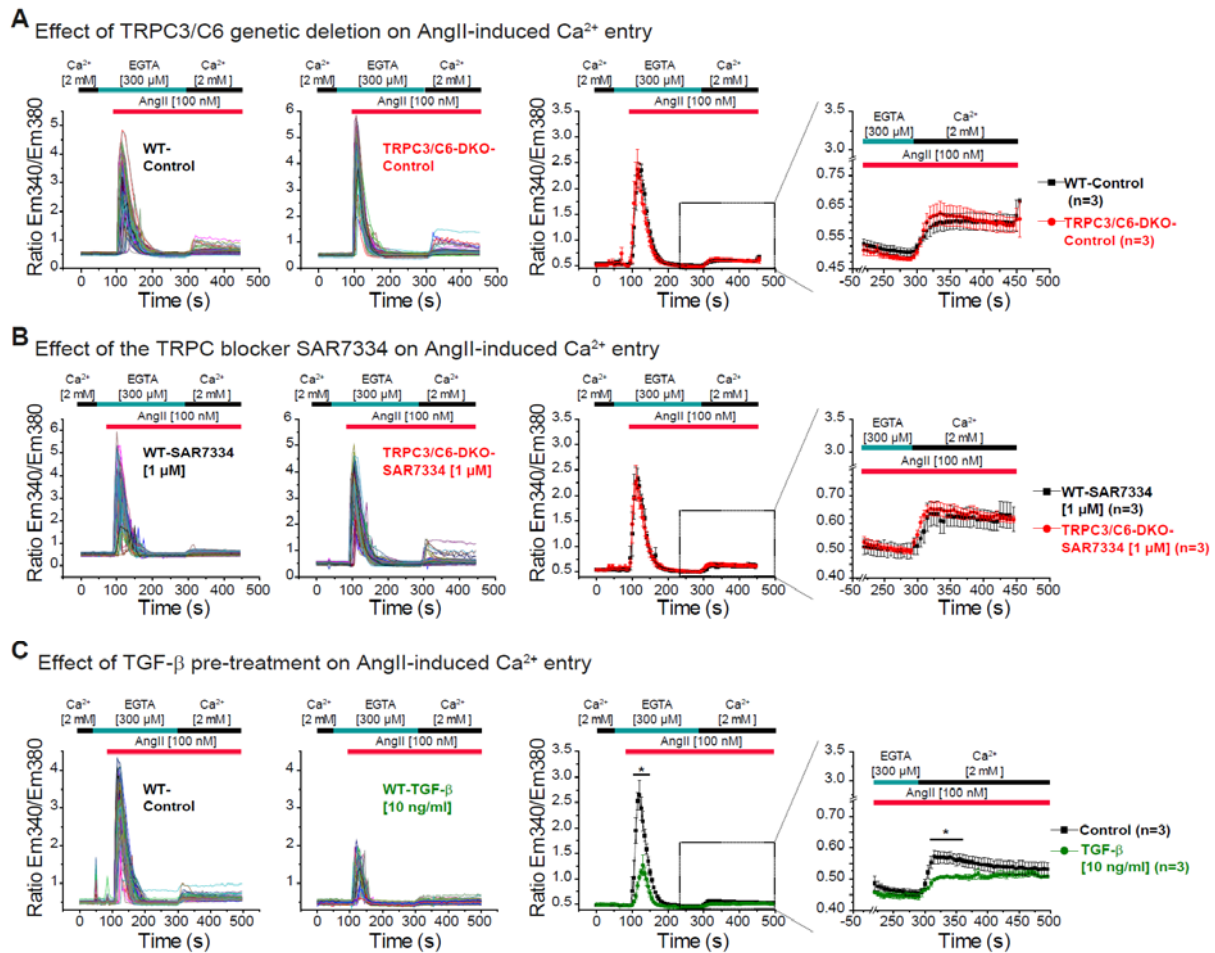

**Figure S2. AngII-induced  $\text{Ca}^{2+}$  release and  $\text{Ca}^{2+}$  entry in the absence of TRPC3/C6 or after TGF- $\beta$  pre-treatment.** (A) AngII-induced  $\text{Ca}^{2+}$  release and  $\text{Ca}^{2+}$  entry in primary CFs from WT (black) and TRPC3/C6-DKO (red) mice.  $\text{Ca}^{2+}$  release was measured in the absence of extracellular  $\text{Ca}^{2+}$  (300  $\mu\text{M}$  EGTA) and  $\text{Ca}^{2+}$  entry was monitored in the presence of 2 mM extracellular  $\text{Ca}^{2+}$ . Left panels: Original traces and right panels: Mean values from three independent preparations (hearts). (B) Measurements performed as in (A) but in cells pre-incubated (10 min) with the TRPC3/C6/C7 antagonist SAR7334 (1  $\mu\text{M}$ ). (C) AngII-induced  $\text{Ca}^{2+}$  release and  $\text{Ca}^{2+}$  entry in primary CFs from WT mice cultivated in the presence of 10 ng/ml TGF- $\beta$  (green) or under control conditions (black). Left panels: Original traces from  $\text{Ca}^{2+}$  measurements and right panels: Mean values from 3 independent preparations. n= number of independent preparations (hearts). All cells were analyzed 6 days after isolation and were cultured at high density. \* $p < 0.05$  according to the unpaired Student's t-test.

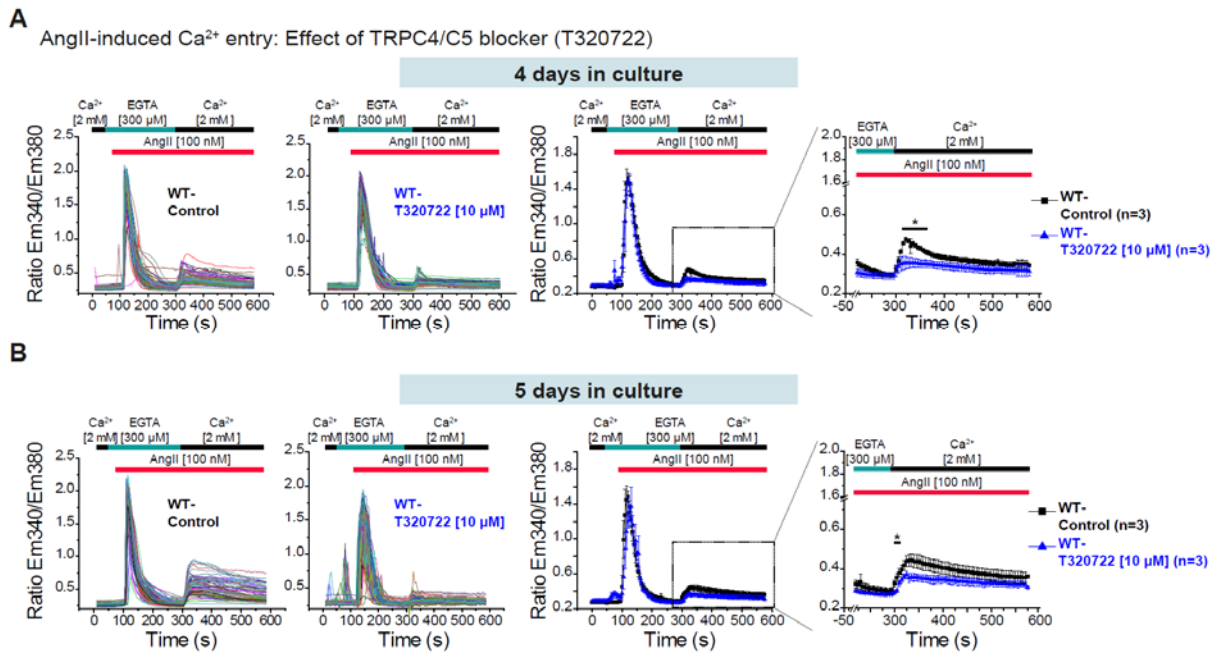

**Figure S3. AngII-induced  $\text{Ca}^{2+}$  release and  $\text{Ca}^{2+}$  entry in cardiac fibroblasts after acute blockage with the TRPC blocker T320722.** (A) AngII-induced  $\text{Ca}^{2+}$  release and  $\text{Ca}^{2+}$  entry in primary cardiac fibroblasts from WT mice pre-incubated (10 min) with 10  $\mu\text{M}$  of the TRPC4/C5 blocker T320722.  $\text{Ca}^{2+}$  release was measured in the absence of extracellular  $\text{Ca}^{2+}$  (300  $\mu\text{M}$  EGTA) and  $\text{Ca}^{2+}$  entry was monitored in the presence of 2 mM extracellular  $\text{Ca}^{2+}$ . Left panels: Original traces and right panels: Mean values of three independent preparations (hearts); cells were analyzed after 4 (A) or 5 days (B) of isolation and were cultured at high density. n= number of independent preparations (hearts). \* $p < 0.05$  according to the unpaired Student's t-test.

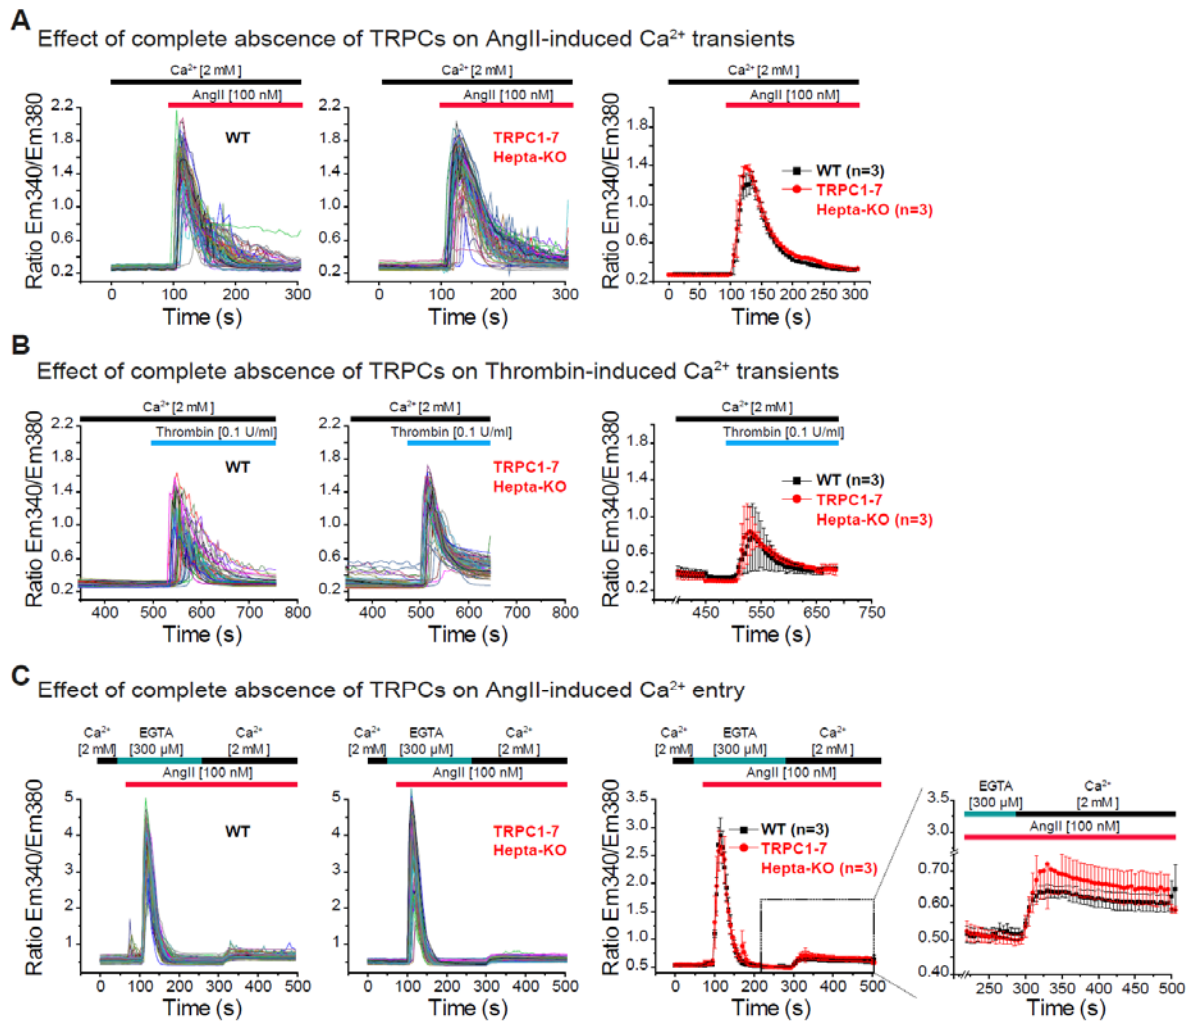

**Figure S4. AngII-induced  $\text{Ca}^{2+}$  release and  $\text{Ca}^{2+}$  entry in cardiac fibroblasts in the absence of all seven TRPC proteins.** (A) AngII- and (B) thrombin-induced  $\text{Ca}^{2+}$  transients in primary CFs from WT (black) and TRPC-hepta (*Trpc1/2/3/4/5/6/7*<sup>-/-</sup>) KO (red) mice.  $\text{Ca}^{2+}$  transients were measured in the presence of 2 mM extracellular  $\text{Ca}^{2+}$ . Left panels: Original traces and right panels: Mean values of three independent preparations (hearts). (C) AngII-induced  $\text{Ca}^{2+}$  release and  $\text{Ca}^{2+}$  entry in primary CFs from WT (black) and TRPC-hepta KO (red) mice.  $\text{Ca}^{2+}$  release was measured in the absence of extracellular  $\text{Ca}^{2+}$  (300  $\mu\text{M}$  EGTA) and  $\text{Ca}^{2+}$  entry was monitored in the in the presence of 2 mM extracellular  $\text{Ca}^{2+}$ . Left panels: Original traces and right panels: Mean values of three independent preparations. n= number of independent preparations (hearts). All cells were analyzed 6 days after isolation and were cultured at high density.

**Table S1. Primers used for qPCR analysis of *Trpc* transcripts.** Primers sequences and probe number for from the Universal Probe Library (Roche).

| <b>Primer name</b> | <b>Primer sequence</b>  | <b>Probe number</b> |
|--------------------|-------------------------|---------------------|
| TRPC1 fw           | ctgaaggatgtgcgagaggt    | 63                  |
| TRPC1 rev          | cacgccagcaagaaaagc      |                     |
| TRPC2sv1 fw        | gtgtggatcgagggttg       | 31                  |
| TRPC2sv1 fw        | acaggatgaccacgtccag     |                     |
| TRPC2sv2 fw        | tcctgtcttctcggagtc      | 52                  |
| TRPC2sv2 fw        | ttcacagatagggcactggac   |                     |
| TRPC3 fw           | ggtgaactgaaagaatcaagca  | 19                  |
| TRPC3 rev          | cgctcgttggtcttatctt     |                     |
| TRPC4 fw           | aaacttttggtcagaaaggtgtc | 104                 |
| TRPC4 rev          | acagttacagcggacctcgt    |                     |
| TRPC5 fw           | ggcataaaagtcattctgtgaa  | 10                  |
| TRPC5rev           | gctaagcagaagttccacagc   |                     |
| TRPC6 fw           | aggcaaaaggttagcgacaa    | 20                  |
| TRPC6 rev          | ggcataaaagtcattctgtgaa  |                     |
| TRPC7 fw           | aatggcgatgtgaacttgc     | 77                  |
| TRPC7 rev          | gttgattcggctcagacttg    |                     |
| H3F3A fw           | gccatcttcaattgtgttcg    | 19                  |
| H3F3A rev          | agccatggaaggacacctc     |                     |
| AIP fw             | accagtcacccaagagg       | 66                  |
| AIP rev            | aggcgatggcgctcatagta    |                     |
| CXCC1 fw           | tagtgccgaccgctgact      | 26                  |
| CXCC1 rev          | ggcctctcccctaactgaat    |                     |

Fw: Forward, rev: reverse.

**Table S2. Immunocytochemistry conditions used for characterization and analysis of cardiac fibroblasts.**

|                                          | <b>anti-P4HB</b>       | <b>anti-DDR2</b>       | <b>anti-<math>\alpha</math>-actinin</b> | <b>anti-<math>\alpha</math>-SMA</b> | <b>anti-CD31</b>       |
|------------------------------------------|------------------------|------------------------|-----------------------------------------|-------------------------------------|------------------------|
| <b>positive control</b>                  | fibroblasts            | fibroblasts            | cardiomyocytes                          | iSMC                                | MAEC                   |
| <b>acetone permeabilization</b>          | yes                    | yes                    | yes                                     | yes                                 | no                     |
| <b>blocking</b>                          | 1 % BSA in PBST        | 1 % BSA in PBST        | 1 % BSA in PBST                         | 1 % BSA in PBST                     | 1 % BSA in PBS         |
| <b>concentration</b>                     | 1 $\mu$ g/ml (in PBST) | 1 $\mu$ g/ml (in PBST) | 150 $\mu$ g/ml (in PBST)                | 10 $\mu$ g/ml (in PBST)             | 10 $\mu$ g/ml (in PBS) |
| <b>incubation time</b>                   | 1 h                    | 1 h                    | 2 h                                     | 2 h                                 | 2 h                    |
| <b>secondary antibody</b>                | anti-rabbit AlexaF488  | anti-goat FITC         | anti-mouse AlexaF594                    | anti-rabbit AlexaF488               | anti-mouse AlexaF594   |
| <b>2<sup>nd</sup>-ab provider</b>        | Invitrogen (A11008)    | Sigma-Aldrich (F9012)  | Invitrogen (A11005)                     | Invitrogen (A11008)                 | Invitrogen (A11005)    |
| <b>2<sup>nd</sup>-ab dilution</b>        | 1:1000 (in PBST)       | 1:200 (in PBST)        | 1:200 (in PBST)                         | 1:200 (in PBST)                     | 1:200 (in PBS)         |
| <b>2<sup>nd</sup>-ab incubation time</b> | 1 h                    | 1 h                    | 1 h                                     | 1 h                                 | 1 h                    |

SMA: Smooth muscle actin, iSMC: ileum smooth muscle cells, MAEC: Mouse aortic endothelial cells, PBS: Phosphate buffered saline, PBST: PBS-Tween 20 and Alexa-F: Alexa Fluor.
